# Supplementary material for: Preoperative fibrinogen/CRP score predicts survival in upper urothelial tract carcinoma patients undergoing radical curative surgery
Source: Springer Nature journal article supplement (doi:10.1007/s00345-023-04379-y), 2023-04-06

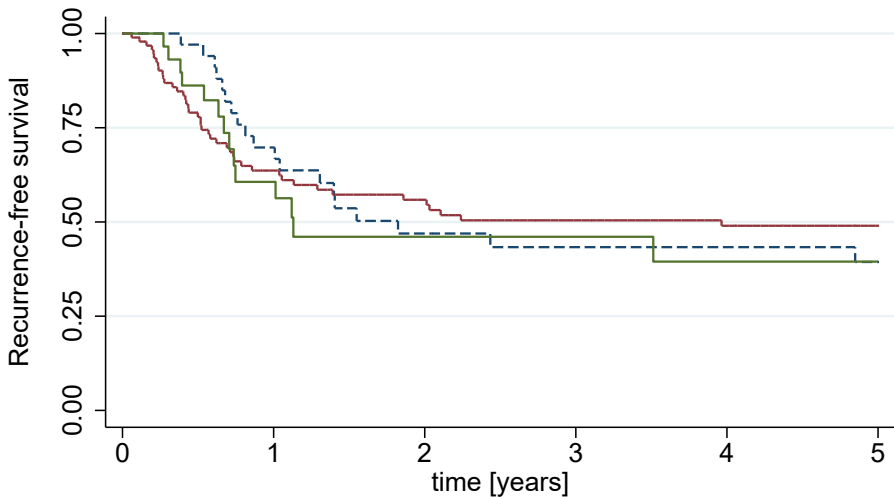

Number at risk

|            |    |    |    |    |    |    |
|------------|----|----|----|----|----|----|
| FC-Score=0 | 38 | 23 | 14 | 12 | 11 | 10 |
| FC-Score=1 | 95 | 50 | 41 | 36 | 34 | 31 |
| FC-Score=2 | 37 | 14 | 9  | 7  | 6  | 5  |

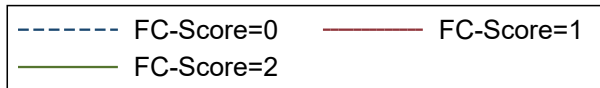

Supplement: MOESM1 [file 25215550]
